# Supplementary material for: Immunomodulatory Activity of Punicalagin, Punicalin, and Ellagic Acid Differs from the Effect of Pomegranate Peel Extract
Source: MDPI journal article supplement (doi:10.3390/molecules27227871), 2022-11-15
Supplement: s1 [file s1]

## Supplementary Figure S1

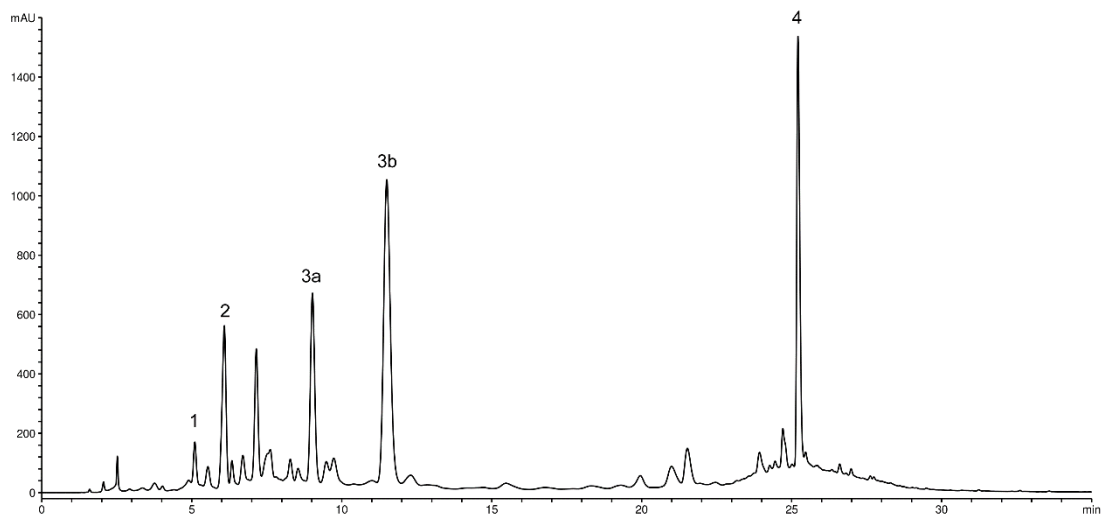

HPLC of PEx. 1. Gallic acid; 2. Punicalin; 3a. Punicalagin- $\alpha$ ; 3b. Punicalagin- $\beta$ ; 4. Ellagic acid.

Published by: Čolić et al. Immunomodulatory Properties of Pomegranate Peel Extract in a Model of Human Peripheral Blood Mononuclear Cell Culture. *Pharmaceutics* 2022, 14, 1140.  
<https://doi.org/10.3390/pharmaceutics14061140> (With permission of MDPI)
